# Supplementary material for: Modernizing carbon dioxide emissions inventories for action in the United States
Source: Research Square preprint supplement (doi:10.21203/rs.3.rs-7456083/v1), 2025-09-16
Supplement: Supplementary file 1 [file 235817f994365d0871bd2dd6.docx]

Supplementary Information

Supplementary Table S1. Definitions of industrial, commercial, and residential building emission types from SCC.

| **NEI** | **Sector** | **SCC Level Two** | **SCC Level Three** |
| --- | --- | --- | --- |
| Nonpoint | Buildings (Commercial) | Commercial/Institutional | * |
| Solid Waste Disposal - Commercial/Institutional |
| Solid Waste Disposal - Government |
| Landfills |
| Leaking Underground Storage Tanks |
| On-site Incineration | Commercial |
| Buildings (Industrial) | Industrial | * |
| In-process Fuel Use |
| Petroleum and Petroleum Product Transport |
| Petroleum and Petroleum Product Storage |
| Miscellaneous Manufacturing Industries |
| Petroleum Industry |
| Solid Waste Disposal - Industrial |
| Food and Kindred Products: SIC 20 |
| Industrial Processes: NEC |
| Electric Utility |
| Total Area Source Fuel Combustion |
| On-site Incineration | Industrial |
| Buildings (Residential) | Residential | * |
| On-site Incineration | Residential |

Supplementary Table S2. Nonpoint CO and CO2 emission factors.

| **Sector** | **Fuel type** | **CO (lb per million BTU)** | **CO2 (lb per million BTU)** |
| --- | --- | --- | --- |
| Electricity Production | Bituminous Coal | 0.72 | 205.52 |
| Subbituminous Coal | 1.00 | 214.09 |
| Bituminous/Subbituminous Coal | 0.86 | 209.80 |
| Coal | 0.86 | 209.80 |
| Anthracite | 0.06 | 228.47 |
| Lignite | 0.38 | 215.30 |
| Natural Gas | 0.16 | 116.82 |
| Distillate Oil | 0.08 | 159.76 |
| Residual Oil | 0.08 | 171.99 |
| Liquified Petroleum Gas (LPG) | 0.15 | 136.66 |
| Process Gas | 0.15 | 119.39 |
| Coke | 0.07 | 222.84 |
| Wood | 1.39 | 206.79 |
| Solid Waste | 0.84 | 199.96 |
| Petroleum | 0.08 | 164.90 |
| Industrial | Bituminous Coal | 0.79 | 205.52 |
| Subbituminous Coal | 0.52 | 214.09 |
| Bituminous/Subbituminous Coal | 0.57 | 209.80 |
| Coal | 0.63 | 209.80 |
| Natural Gas | 0.14 | 116.82 |
| Anthracite | 0.06 | 228.47 |
| Waste Oil | 0.03 | 162.60 |
| Distillate Oil | 0.08 | 159.76 |
| Residual Oil | 0.08 | 171.99 |
| Liquified Petroleum Gas (LPG) | 0.22 | 136.66 |
| Coke | 0.07 | 222.84 |
| Process Gas | 0.78 | 119.39 |
| Kerosene | 0.08 | 157.80 |
| Jet Fuel | 0.08 | 154.74 |
| Propane | 0.22 | 137.72 |
| Wood | 1.56 | 206.79 |
| Wood Refuse | 17.34 | 206.79 |
| Solid Waste | 0.47 | 199.96 |
| Refuse | 0.47 | 199.96 |
| Gasoline | 36.61 | 154.74 |
| Diesel | 2.21 | 161.95 |
| Refinery Gas | 0.78 | 119.40 |
| Petroleum | 0.08 | 161.35 |
| Charcoal | 23.15 | 186.14 |
| Commercial/Institutional | Anthracite Coal | 0.06 | 228.47 |
| Bituminous Coal | 0.57 | 205.52 |
| Subbituminous Coal | 0.52 | 214.09 |
| Bituminous/Subbituminous Coal | 0.57 | 209.80 |
| Coal | 0.55 | 209.80 |
| Natural Gas | 0.19 | 116.82 |
| Distillate Oil | 0.08 | 159.76 |
| Residual Oil | 0.08 | 171.99 |
| Liquified Petroleum Gas (LPG) | 0.22 | 136.66 |
| Kerosene | 0.08 | 157.80 |
| Jet Fuel | 0.38 | 154.74 |
| Diesel | 2.21 | 161.95 |
| Gasoline | 36.61 | 154.74 |
| Propane | 0.22 | 137.72 |
| Coke | 0.07 | 222.84 |
| Anthracite culm | 0.03 | 228.47 |
| Wood | 1.45 | 206.79 |
| Leaves | 21.25 | 260.52 |
| Field Crops | 28.89 | 260.52 |
| Forest Residues | 24.17 | 206.79 |
| Landfill Gas | 0.00 | 114.79 |
| Hamburger | 0.04 | 104.90 |
| Solid Waste | 0.72 | 199.96 |
| Non-Road Gasoline | 100.38 | 155.11 |
| Petroleum | 0.08 | 159.76 |
| Residential | Bituminous Coal | 26.85 | 205.52 |
| Subbituminous Coal | 37.42 | 214.09 |
| Bituminous/Subbituminous Coal | 31.26 | 209.80 |
| Coal | 31.26 | 209.80 |
| Anthracite | 28.41 | 228.47 |
| Natural Gas | 0.09 | 116.82 |
| Distillate Oil | 0.08 | 159.76 |
| Residual Oil | 0.08 | 171.99 |
| Liquified Petroleum Gas (LPG) | 0.12 | 136.66 |
| Kerosene | 0.08 | 157.8 |
| Propane | 0.22 | 137.72 |
| Wood | 17.67 | 206.79 |
| Firelog | 23.95 | 206.79 |
| Oven-dried wood | 23.95 | 206.79 |
| Wood Refuse | 24.17 | 206.79 |
| Charcoal | 23.15 | 186.14 |
| Leaves | 21.25 | 260.52 |
| Petroleum | 0.08 | 159.76 |

Supplementary Table S3. Fuel Categories table. Across input sources, fuel categories are available in varied levels of specificity, e.g., distillate fuel oil vs. petroleum. The specific method of mapping from fine-grained fuel type to our internal coarse-grained fuel type varies by input data source. Various crosswalks have been developed to aggregate fine-grain fuel types to coarser fuel type categories.

| **fuel_id** | **fuel_type** |
| --- | --- |
| 1 | Coal |
| 2 | Petroleum |
| 3 | Natural Gas |
| 4 | Other |
| 5 | Renewable |
| 6 | Biomass |

Supplementary Table S4. User class from FAA 5010 LTO columns.

| **General User Class** | **FAA 5010 Column Name** |
| --- | --- |
| GA | GA Local Operations, GA Itin Operations, Commuter Operations |
| AT | Air Taxi Operations |
| MIL | Military Operations |
| AC | Commercial Operations |

#### Supplementary Table S5. TFMSC user class abbreviations

| **TFMSC User class** | **General User Class** |
| --- | --- |
| General Aviation | GA |
| Air Taxi | AT |
| Military | MIL |
| Air Carrier | AC |
| Commuter | GA |
| Freight | AC |
| Other | GA |
| ? | GA |

####

#### Supplementary Table S6. TFMSC Engine type mappings

| **Engine type** | **Abbreviations** |
| --- | --- |
| Propeller | prop |
| Helicopter | prop |
| Turbine | jet |
| Piston | prop |
| Jet | jet |

#####

##### Supplementary Table S7. IPCC emission factors

| **Aircraft type** | **CO2 LTO emission factor** | **Engine type** |
| --- | --- | --- |
| A300 | 5.470 | jet |
| A310 | 4.9 | jet |
| A320 | 2.56 | jet |
| BAC1-11 | 2.15 | jet |
| BAe 146 | 1.8 | jet |
| B707 | 5.88 | jet |
| B727 | 4.455 | jet |
| B727* | 3.98 | jet |
| B737-300 | 2.905 | jet |
| B737 | 2.75 | jet |
| B737-400 | 2.625 | jet |
| B747-200 | 10.68 | jet |
| B747 | 10.145 | jet |
| B747-400 | 10.71 | jet |
| B757 | 4.11 | jet |
| B767 | 5.405 | jet |
| Caravelle* | 2.655 | jet |
| DC8 | 5.89 | jet |
| DC9 | 2.78 | jet |
| DC10 | 7.46 | jet |
| F28 | 2.115 | jet |
| F100 | 2.34 | jet |
| L1011 | 8.025 | jet |
| SAAB 340 | 0.945 | jet |
| Tupolev 154 | 6.92 | jet |
| Concorde | 20.29 | jet |
| GAjet | 2.15 | jet |

Source: IPCC Guidelines on National Greenhouse Gas Inventories. Reference Manual, page 1.96.

#####

##### Supplementary Table S8. EPA emission factors by engine type

| **General User class** | **CO2 LTO emission factor** | **Engine type** |
| --- | --- | --- |
| GA | 0.096 | prop |
| GA | 0.497 | jet |
| AT | 0.268 | prop |
| AT | 0.686 | jet |

Source: <https://forum.cmascenter.org/t/nei-documentation-moving-from-ftp-to/4719>

#####

##### Supplementary Table S9. EPA emission factors by general user class

| **General User class** | **CO2 LTO emission factor** |
| --- | --- |
| MIL | 1.32 |
| AC | 2.42 |
| GA | 0.096 |
| AT | 2.68 |

Source: <https://forum.cmascenter.org/t/nei-documentation-moving-from-ftp-to/4719>

#### Supplementary Table S10. Mobile sector classification

| **NEI Data Category** | **Sector/Sector Type** | **EPA SCC Level Two** |
| --- | --- | --- |
| Nonroad | Mobile/Marine vessels | Marine Vessels; Commercial |
| Nonpoint |
| Point |
| Nonroad | Marine Vessels; Military |
| Nonpoint |
| Nonroad | Mobile/Railroad | Railroad Equipment |
| Nonpoint |
| Point |

####

#### Supplementary Table S11. SCC level-two key words for the Nonroad sector.

| **NEI Data Category** | **Sector** | **EPA SCC Level Two** | **EPA SCC Level Three** |
| --- | --- | --- | --- |
| Nonroad | Nonroad | CNG | * minus “Agricultural Equipment” |
| LPG |
| Off-highway Vehicle Gasoline, 2-Stroke |
| Off-highway Vehicle Gasoline, 4-Stroke |
| Off-highway Vehicle Diesel |
| Off-highway Vehicle Gasoline |
| Off-highway Vehicle LPG |
| Off-highway Vehicle CNG |
| Pleasure Craft |
